# Supplementary material for: Spontaneously hierarchical self-assembly of nanofibres into fluorescent spherical particles: a leap from organogels to macroscopic solid spheres
Source: Royal Society of Chemistry journal article supplement (doi:10.1039/c8sm02106f), 2018-12-10
Supplement: c8sm02106f1.pdf [file c8sm02106f1.pdf]

# Spontaneously Hierarchical Self-assembly of Nanofibres into Fluorescent Spherical Particles:

## A Leap from Organogels to Macroscopic Solid Spheres

Yahan Shan,<sup>a</sup> Shiwen Li,<sup>a</sup> Rui Wang,<sup>a</sup> Si Yi Zhu,<sup>b</sup> Fei Wu<sup>\*a</sup>, Yang Fu,<sup>b</sup> and Linna Zhu<sup>\*a</sup>

<sup>a</sup>Chongqing Key Laboratory for Advanced Materials and Technologies of Clean Energy, Faculty of Materials & Energy, Southwest University, Chongqing 400715, P.R. China.

<sup>b</sup>Key Laboratory of Functional Small Organic Molecules, Ministry of Education, College of Chemistry and Chemical Engineering, Jiangxi Normal University, P.R. China.

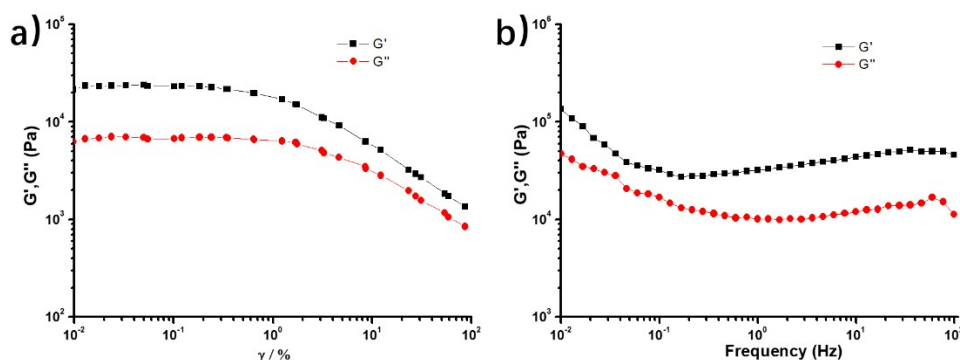

Figure S1. Dynamic oscillatory data for SY1/EA gel (13 mg/mL) at 25°C. (a) Strain sweep at a frequency of 1 Hz. (b) Frequency sweep at a strain of 0.1%.

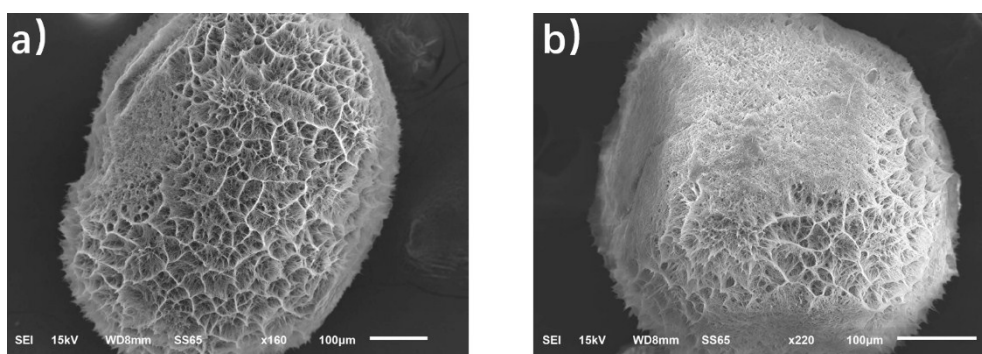

Figure S2. SEM images of the transformed solid from gel in the concentration of a) 15 mg/mL and b) 20mg/mL.

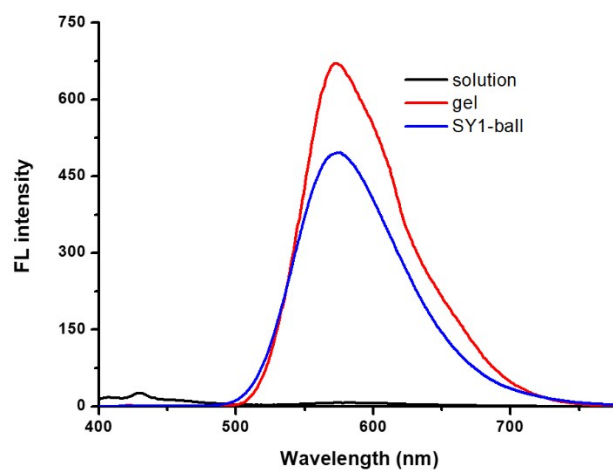

Figure S3. Fluorescence spectra of hot solution, gel and SY1-ball.

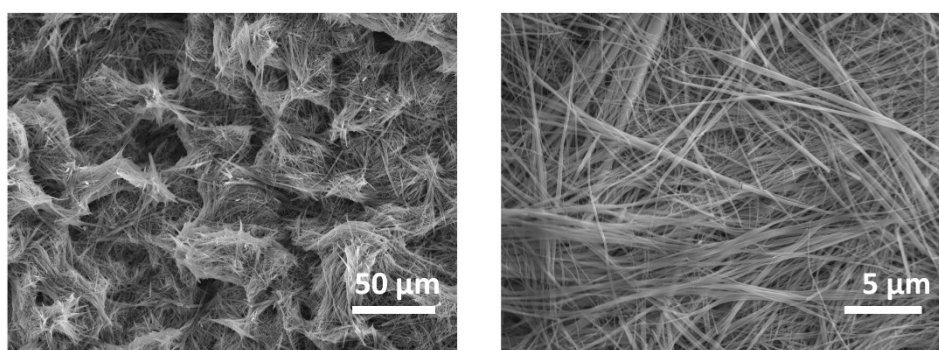

Figure S4. SEM images of the liquid phase after the formation of SY1-balls. The images were measured after the solvent is evaporated.

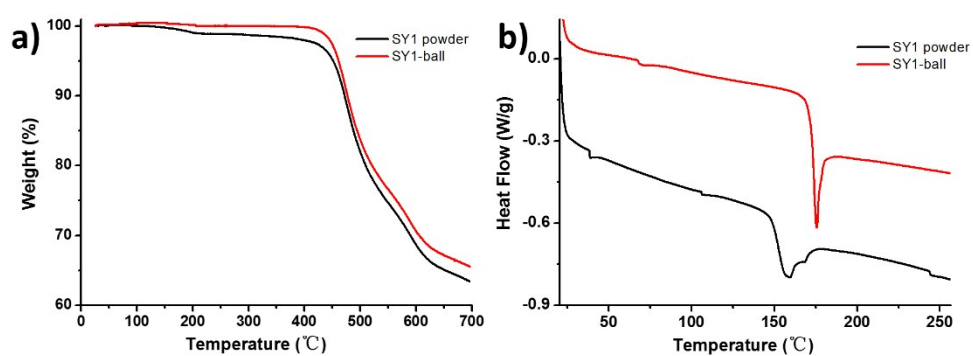

Figure S5. a) TGA and b) DSC curves of as-prepared SY1 powder (black) and SY1-ball (red).

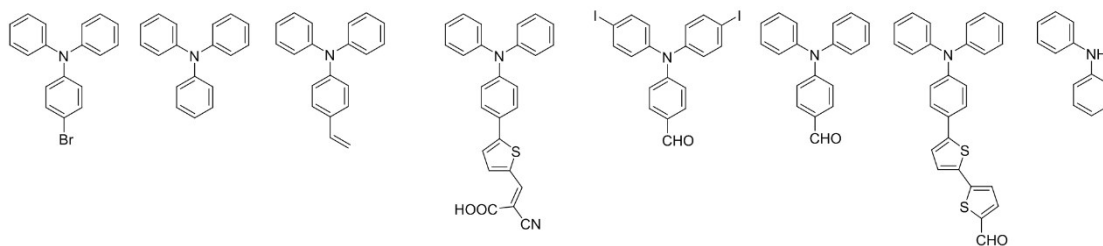

Figure S6. Molecular structure of the other triphenylamine derivatives which we have tried to mix with SY1 in toluene.

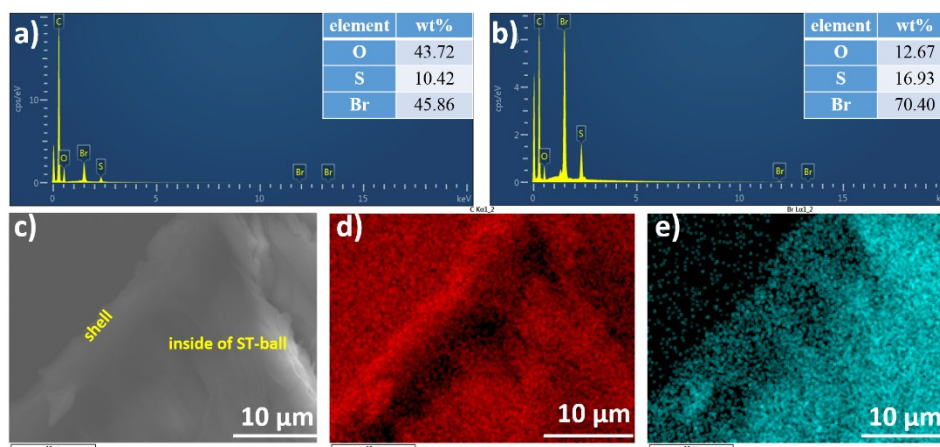

Figure S7. EDS analysis results of ST-ball for a) shell and b) core and the corresponding elements content. C) SEM photograph and elemental mapping images of ST-ball for d) O and e) Br with color superposition (O: purple, Br: blue).

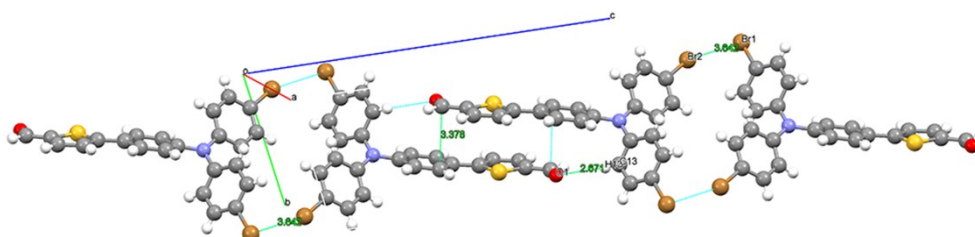

Figure S8. Packing mode of TPA1 in the single crystal, the  $\pi$ - $\pi$ , Br $\cdots$ Br and H $\cdots$ O H-bonding interactions are clearly indicated. Different atoms are denoted in different colors (O: red, Br: brown, N: blue, C: gray, H: white).

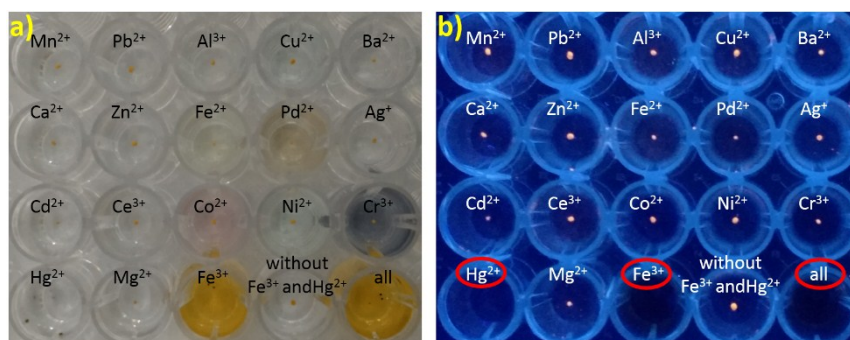

Figure S9. Responses of SY1-balls to various metal ions under a) day light, and b) 365 nm UV light.

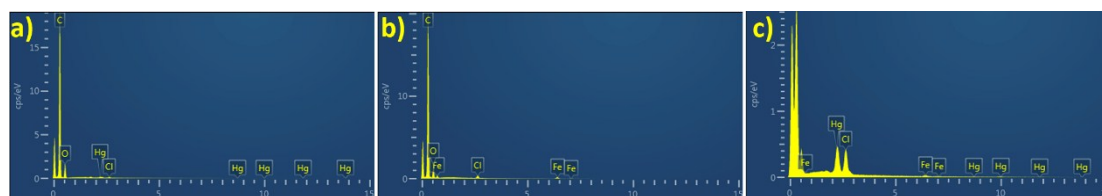

Figure S10. EDS spectra of SY1-balls after treatment with a)  $Hg^{2+}$ , b)  $Fe^{3+}$ , c) all the tested ions.

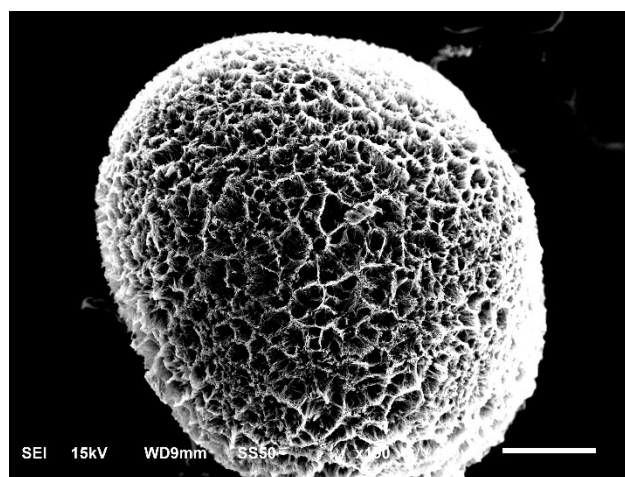

Figure S11. SEM image of SY1-ball after adsorbing  $Fe^{3+}$  or  $Hg^{2+}$ .
